# Supplementary material for: Dopamine D1 Receptor in Cancer
Source: MDPI journal article supplement (doi:10.3390/cancers12113232), 2020-11-02
Supplement: s1 [file s1]

# Supplementary Materials: Dopamine D1 Receptor in Cancer

Paweł Sobczuk, Michał Łomiak and Agnieszka Cudnoch-Jędrzejewska

**Table S1.** Summary of current data about mRNA and protein expression of type 1 dopamine receptor. Name of cell line or type of examined material is given in brackets.

| Cancer Type                     | D1r Expression                                                                                                                                         | Ref.            |
|---------------------------------|--------------------------------------------------------------------------------------------------------------------------------------------------------|-----------------|
| Acute T cell leukemia           | - protein (Jurkat cells) - present                                                                                                                     | [107], [110]    |
| Astrocytoma                     | protein (D384) – present                                                                                                                               | [167]           |
| Lymphocytes B malignancies      | -mRNA (DOHH2, H929, KMS11, K1106, K422, LILA OZ, PRI, RAMOS, REC-1) – present or overexpression                                                        | [168]           |
| Cholangiocarcinoma              | - mRNA (Mz-ChA-1) - overexpression<br>- mRNA (HuCCT-1, CCLP-1) downregulation<br>- mRNA (SG231) – present                                              | [169]           |
| Colon cancer                    | - mRNA (HCT116, HT29, RKOp, RKOr1) overexpression                                                                                                      | [58,170]        |
| Ependyoma                       | -protein (patients' samples) – overexpression in 30% cases                                                                                             | [171]           |
| Gist                            | - protein (patients' samples) - overexpression                                                                                                         | [171]           |
| Glioma                          | - protein (patients samples) - overexpression                                                                                                          | [103]           |
| Hepatocellular carcinoma        | - mRNA (Hep3B, patients samples) – upregulation                                                                                                        | [58], [172]     |
| Melanoma                        | - protein (patients' samples) – overexpression in less than 25% cases<br>- lack of mRNA for D1 receptor in cell lines derived from melanoma metastases | [171,173]       |
| Myelogenous leukemia            | - protein (K562) - present                                                                                                                             | [171]           |
| Neuroblastoma                   | -protein (NS20Y)<br>- mRNA (SK-N-MC, SKNSH) - upregulation                                                                                             | [58,174,175]    |
| Osteosarcoma                    | - protein (OS732) - present                                                                                                                            | [55]            |
| Ovarian cancer                  | - protein (patients' samples) – overexpression in 50% cases                                                                                            | [171], [23,126] |
| Pancreatic cancer               | - protein (SW1990, patient-derived xenografts) - upregulation                                                                                          | [116]           |
| Pancreatic neuroendocrine tumor | mRNA (BON) - present                                                                                                                                   | [176]           |
| Pheochromocytoma                | - protein (patients' samples) – overexpression in less than 25% cases                                                                                  | [171]           |
| Renal cell cancer               | - protein (patients' samples) – overexpression in 50% cases                                                                                            | [171]           |
| Retinoblastoma                  | -protein (WERI 27)                                                                                                                                     | [175]           |
| Synovial sarcoma                | -protein (patients' samples)- overexpression in 21% cases                                                                                              | [171]           |
| Small cell lung carcinoma       | - protein (patients' samples, patients' derived cell lines, H69) - overexpression                                                                      | [113]           |

**Table S2.** Dopamine D1 receptor agonists and antagonists.

| Name            | Other information                                                                           |
|-----------------|---------------------------------------------------------------------------------------------|
| <b>Agonists</b> |                                                                                             |
| 6-Br-APB        | selective D1 receptor agonist<br>90-fold selectivity for D <sub>1</sub> over D <sub>2</sub> |
| A-68930         | selective D1 receptor agonist                                                               |
| A-77636         | selective D1 receptor agonist                                                               |
| A86929          | selective dopamine D1 receptor agonist                                                      |

|                     |                                                                                                                                                       |
|---------------------|-------------------------------------------------------------------------------------------------------------------------------------------------------|
|                     | 14-fold selectivity for D <sub>1</sub> -like receptors over D <sub>2</sub>                                                                            |
| dihydroxidine       | selective dopamine D <sub>1</sub> receptor agonist<br>10-fold selectivity for D <sub>1</sub> -like receptors over D <sub>2</sub>                      |
| dinapsoline         | selective dopamine D <sub>1</sub> receptor agonist<br>5-fold selectivity for D <sub>1</sub> -like receptors over D <sub>2</sub>                       |
| doxanthrine         | dopamine D <sub>1</sub> receptor and D <sub>2</sub> receptor agonist<br>168-fold greater selectivity for D <sub>1</sub> over D <sub>2</sub> receptors |
| fenoldopam          | highly selective peripheral D <sub>1</sub> receptor partial agonist                                                                                   |
| PF-06649751         | dopamine D <sub>1</sub> and D <sub>5</sub> receptors partial agonist                                                                                  |
| SKF89145            | selective D <sub>1</sub> receptor agonist                                                                                                             |
| SKF89626            | selective D <sub>1</sub> receptor agonist                                                                                                             |
| SKF38393            | very high selectivity for D <sub>1</sub> with negligible affinity for any other receptor                                                              |
| SKF81297            | dopamine D <sub>1</sub> and D <sub>5</sub> receptors agonist<br>200-fold selectivity for D <sub>1</sub> over any other receptor                       |
| SKF82958            | dopamine D <sub>1</sub> and D <sub>5</sub> receptors agonist<br>57-fold selectivity for D <sub>1</sub> over D <sub>2</sub>                            |
| stepholidine        | D <sub>1</sub> agonist and D <sub>2</sub> antagonist                                                                                                  |
| <b>Antagonists</b>  |                                                                                                                                                       |
| ecipopam (SCH39166) | D <sub>1</sub> and D <sub>5</sub> receptors antagonist                                                                                                |
| SCH23390            | D <sub>1</sub> receptor agonist with minimal effect of D <sub>2</sub> receptor                                                                        |

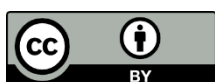

© 2020 by the authors. Licensee MDPI, Basel, Switzerland. This article is an open access article distributed under the terms and conditions of the Creative Commons Attribution (CC BY) license (<http://creativecommons.org/licenses/by/4.0/>).
